# Supplementary material
Source: MDPI journal article supplement (https://www.mdpi.com/1996-1073/6/4/2291)
Supplement: s1 [file s1]

*Energies* **2013**, *6*, 2291-2304; doi:10.3390/en6042291

**OPEN ACCESS**

energies

**ISSN 1996-1073**

www.mdpi.com/journal/energies

*Article*

**Effect of Burnable Absorbers on Inert Matrix Fuel
Performance and Transuranic Burnup in a Low Power Density Light-Water Reactor**

**Geoff Recktenwald and Mark Deinert ***

Department of Mechanical Engineering, The University of Texas at Austin, 1 University Station C2200, Austin TX 78715-0162, USA.

***** Author to whom correspondence should be addressed; E-Mail: mdeinert@utexas.edu;
Tel.: (512) 471-7916; Fax: (512) 471-1045.

Received: 21 January 2013; in revised form: 20 March 2013 / Accepted: 4 April 2013 /
Published: 22 April 2013

Supplemental Information

This supplemental material provides additional details on the simulations and results. Specifically we provide additional details on the following:

S.1 The core layout and fuel composition;

S.2 Thermal transport calculations;

S.3 Reactivity coefficients;

S.4 Uncertainty in power calculations.

S1. Core Layout and Equilibrated Fuel Composition

Figure S1 shows a ¼ section of the simulated core along with the water jacket and reactor pressure vessel. The core is a modified from an AP1000 [1], where the 17 × 17 assemblies have been replaced by 8 × 8 assemblies to better distribute the inert matrix fuel. Different colors represent qualitatively different material regions within the core. The four control guide tubes are visible in each assembly.

**Figure S1.** Reactor Core configuration.


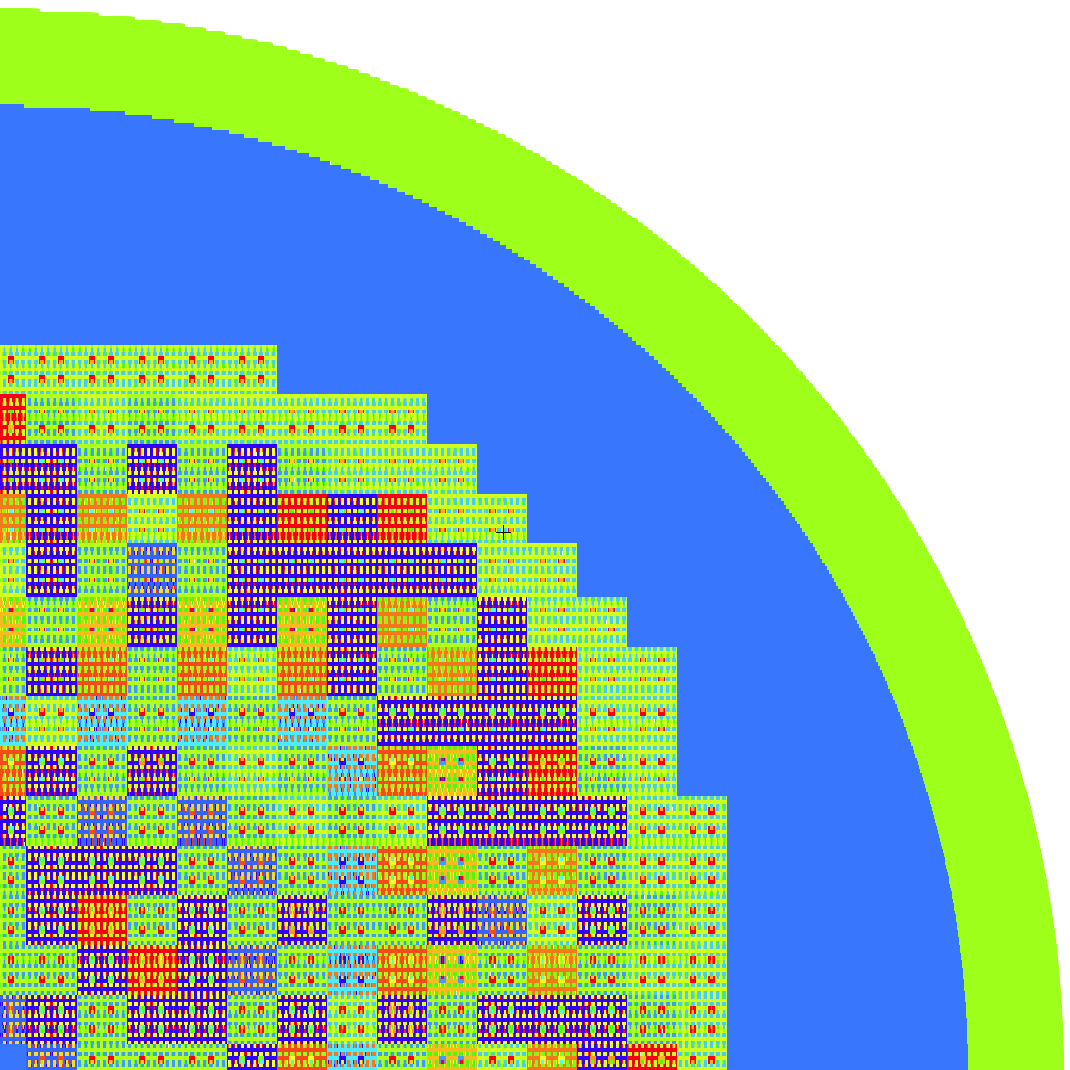


The active core contains 712 8 × 8 assemblies and a single assembly void at the center. The active core is surrounded by a water jacket (blue) between 25–50 cm wide and a 20 cm thick pressure vessel. The water in the reactor is presumed to be 2% stainless steel by volume to account for structural material. Image generated from MCNPX plot utilities [2].

The composition of the uranium and inert matrix fuels were equilibrated to reflect the isotopes that would be encountered in a real reactor containing fuel at various degrees of burnup. This was done by iterating on the fuel composition until the end of life fuel composition in campaign *j* was identical to the beginning of life composition in campaign *j + 1* fuel for each fuel form and age of fuel, Equation (1)

Figures S2–S4 show the path of heavy metal, and plutonium isotopes through a full set of campaigns. The dots in the graph depict the beginning and end of the cycle for each assembly campaign. Importantly the lines are piecewise continuous indicating that the reactor has reached an equilibrium operating configuration. The rising curve on the left shows the transuranic heavy metal content of the uranium dioxide fuel as a function of residence time. The dashed line represents a 5-year cooling time for discharged spent uranium dioxide fuel. The curve on the right shows the transuranic heavy metal content of the inert matrix fuel as a function of residence time.

**Figure S2.** Fuel transuranic content as a function of time.

The figure shows the transuranic heavy metal content of the fuel campaigns as a function of residence time. The dots in the graph depict the beginning and end of the cycle for each assembly campaign. The rising curve on the left and the falling curve on the right show the transuranic heavy metal of the uranium dioxide and inert matrix fuels respectively. The dashed line represents a 5-year cooling time for discharged spent uranium dioxide fuel. The continuity of the curves shows that the reactor has reached refueling equilibrium.

**Figure S3.** Plutonium content as a function of residence time.

The figure shows the plutonium content of the reactor as a function of residence time. The dots in the graph depict the beginning and end of the cycle for each assembly campaign. The rising curves on the left and the falling curves on the right show the plutonium content of the uranium dioxide and inert matrix fuels respectively. The dashed line represents a 5-year cooling time for discharged spent uranium dioxide fuel. The continuity of the curves shows that the reactor has reached refueling equilibrium.

Ideally the transuranic content of the beginning of life inert matrix fuel assemblies will exactly match the transuranic content of the end of life uranium assemblies. This is impossible since the reactor has an integer number of assemblies. However, for a fixed core size, reducing the size of the assemblies will increase the total number of assemblies and allow for a closer match. Wasn't this said in the main paper?

**Figure S4.** Heavy metal content in the inert matrix fuel cycle.


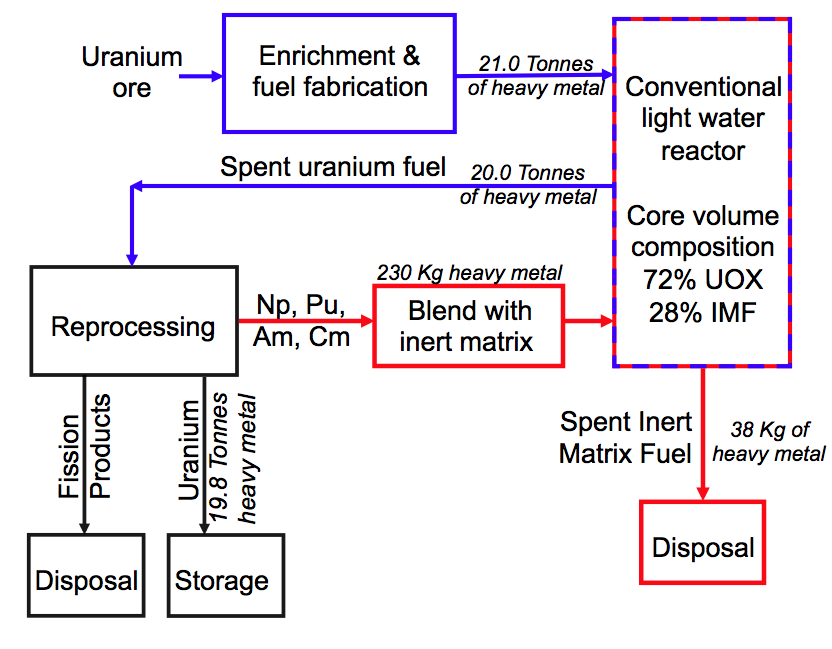


The figure shows the content of the heavy metal at various stages in the inert matrix fuel cycle. While inert matrix fuel assembles comprise 28% of the volume in the reactor they only account for 1% of the heavy metal content.

S2. Thermal Transport

The centerline fuel and outer cladding temperatures were determined using a steady state thermal transport model:

|  | (S1) |
| --- | --- |

where *q*’ is the linear power density of the fuel W/m; ∆*T* is the temperature difference between two points; and R is the thermal resistance between those points. The linear power density was determined using the MCNPX simulations. The temperature of the moderator along a coolant channel was determined using Newton’s law of cooling and the temperature dependent heat capacity of water. The respective equations for the axially dependent temperatures of the fuel, cladding, and moderator are:

|  | (S2) |
| --- | --- |
|  | (S3) |
|  | (S4) |
|  | (S5) |
|  | (S6) |

Here is the moderator flow rate (kg/sec) in a single channel and *cp* is the temperature dependent heat capacity of the coolant (J/kg•K). The respective thermal resistances are given by [3]:

|  | (S7) |
| --- | --- |
|  | (S8) |
|  | (S9) |
|  | (S10) |

where *rfuel, tgap*, and *tclad* are given in Table 1 of the main text and *hgap*, with the respective *kfuel* for uranium dioxide (*kUOX*) and inert matrix fuel (*kIMF*), are in Table 2 of the main text. The convective heat transfer coefficient was given by [3]:

|  | (S11) |
| --- | --- |

where *kmod* is the thermal conductivity of the moderator; Re and Pr are the Reynolds and Prandtl numbers respectively, with *C* given by:

|  | (S12) |
| --- | --- |

Here *Vw* and *Vf* are the water and fuel volume respectively and *De* = 4 x (cross sectional area of a coolant channel/wetted perimeter of a coolant channel). The thermal conductivity of the coolant was taken to be *kmod* = 0.51 W/m [3].

The computation of temperatures is also dependent on the thermal conductivity of the materials. Figure S5 shows the thermal conductivity of uranium dioxide, zirconium based inert matrix fuel, and zircalloy cladding. The reactor environment has a broad range of temperatures, but this thermal analysis is done with mean temperatures and thermal conductivity coefficients.

**Figure S5.** Thermal conductivity coefficients for reactor materials.

*
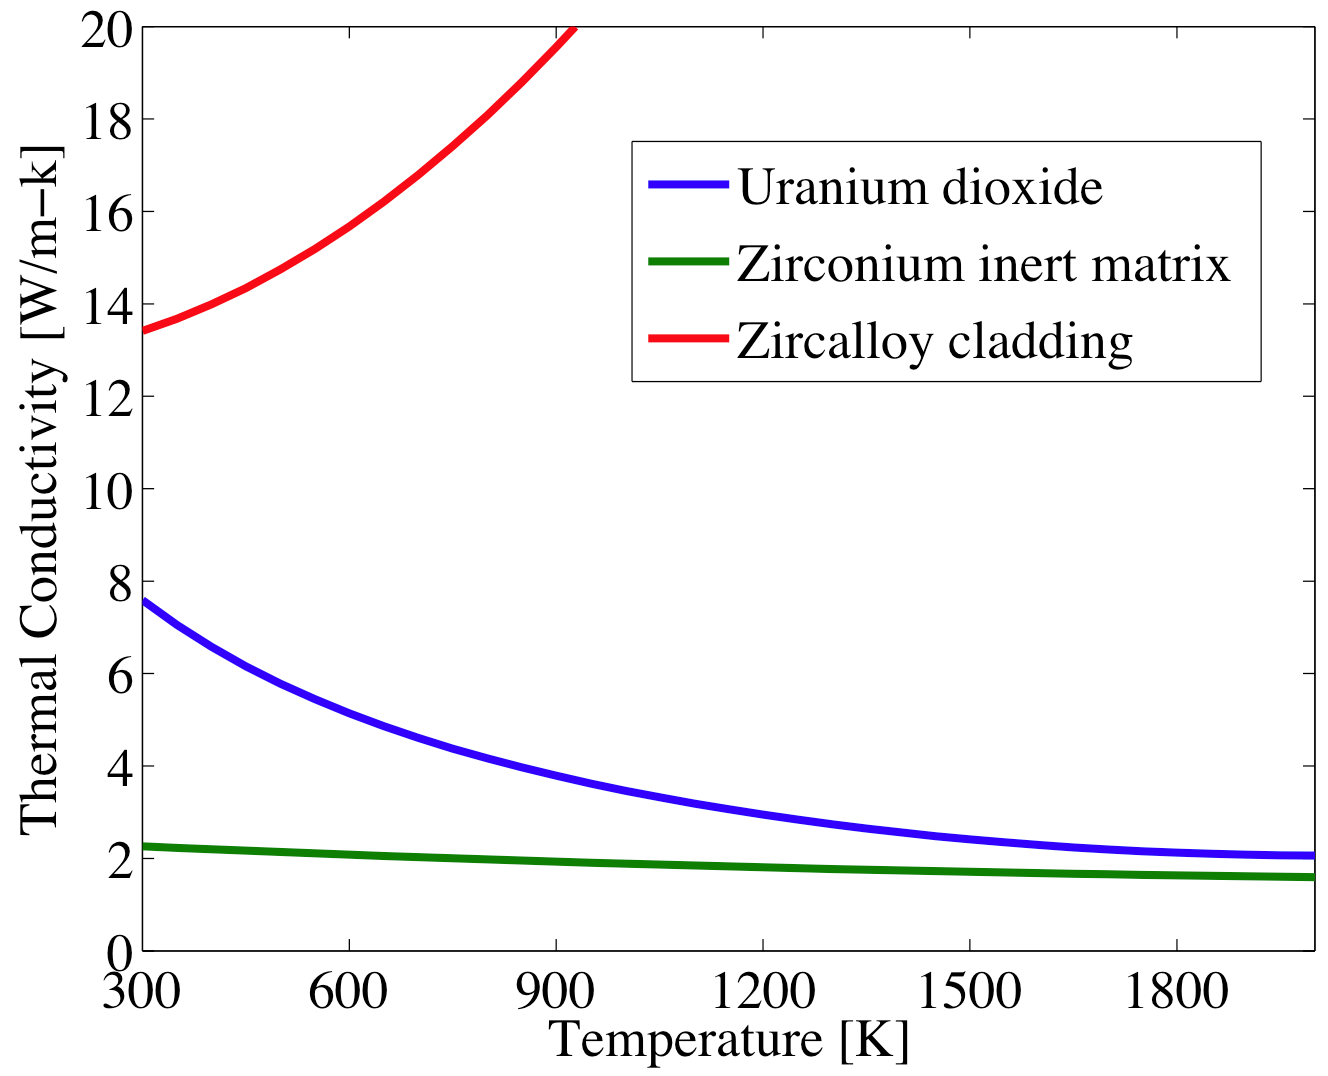
*

The thermal conductivity of uranium dioxide fuel is more than 50% higher than the thermal conductivity of the inert matrix fuel at operating temperatures. The zircalloy cladding has a much more favorable thermal conductivity but does not see high temperatures because of it’s proximity to
the moderator.

Figure E was created from recommended functions for uranium dioxide (S13) [4], zirconium based inert matrix fuel (S14) [5], and zircalloy cladding (S15) [4]:

|  | (S13) |
| --- | --- |

where t = T/1000, and

|  | (S14) |
| --- | --- |
|  | (S15) |

S.3. Reactivity Coefficients

Figure S6 shows the coefficients of thermal reactivity for the fuel. These were computed with Equation (3) using full core simulations and by perturbing the temperature of the fuel in all assemblies of a given type by ±50 K. Figure S7 shows the fuel coefficients of reactivity for each of the 10 fuel assembly types at the beginning and end of cycle.

The assembly level moderator coefficients of reactivity were computed with Equation (4) using full core simulations and by varying the moderator temperatures by ±10 K in the assemblies of a given type. The moderator density was updated to match saturated liquid water tables at a pressure of 155 bar. Figure S7 shows the moderator coefficients of reactivity for each of the 10 fuel assembly types at the beginning and end of cycle.

The void coefficients were computed with Equation (5) using full core simulations and by decreasing the fluid density by 10% uniformly within the assemblies of a given type. Figure S9 shows the moderator coefficients of reactivity for each of the 10 fuel assembly types at the beginning and end of cycle.

Unlike the core averaged void and moderator reactivity coefficients shown in the main body of the paper, the assembly level coefficients are not uniformly negative.

**Figure S6.** Fuel reactivity coefficient at beginning of cycle.

**
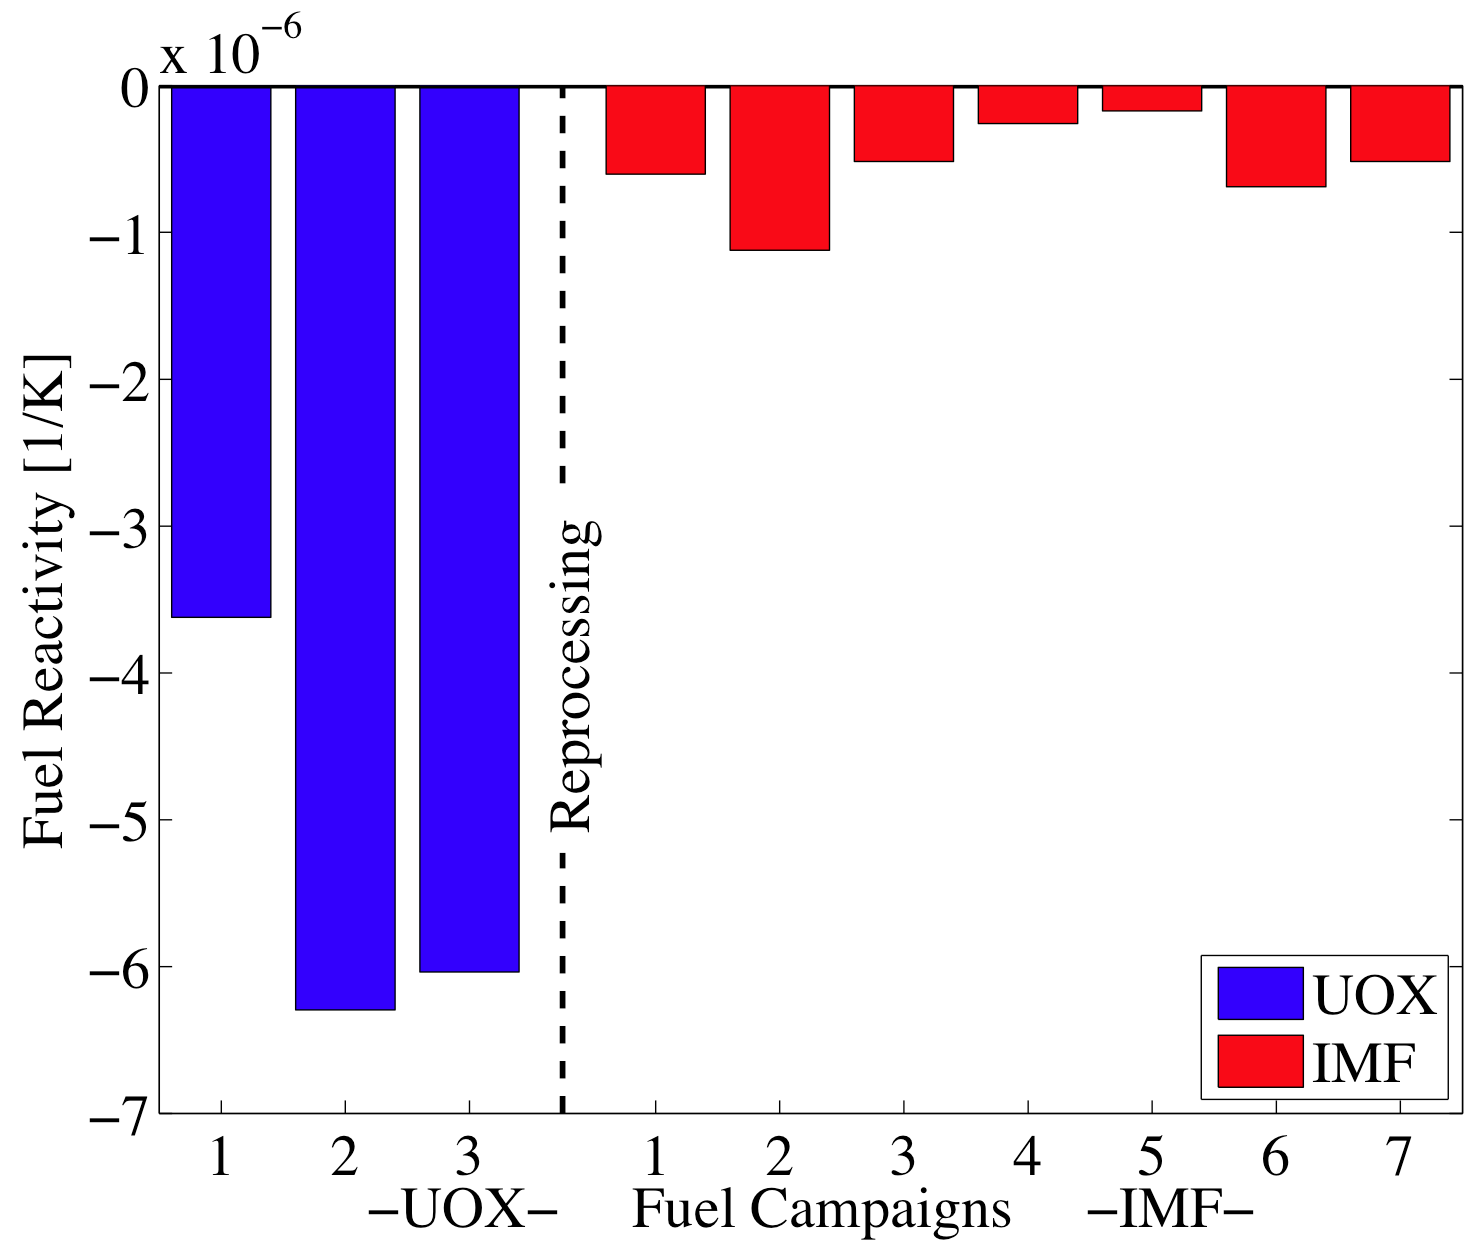
**

The reactivity coefficients for the fuel are shown for each assembly at the beginning of cycle. The full reactor reactivity coefficient at the beginning was −16.6 × 10−6 ± 1.2 × 10−7 (1/K). The data were generated using Monte Carlo simulations and the graphs do not show the standard deviations.

**Figure S7.** Fuel reactivity coefficient at end of cycle.


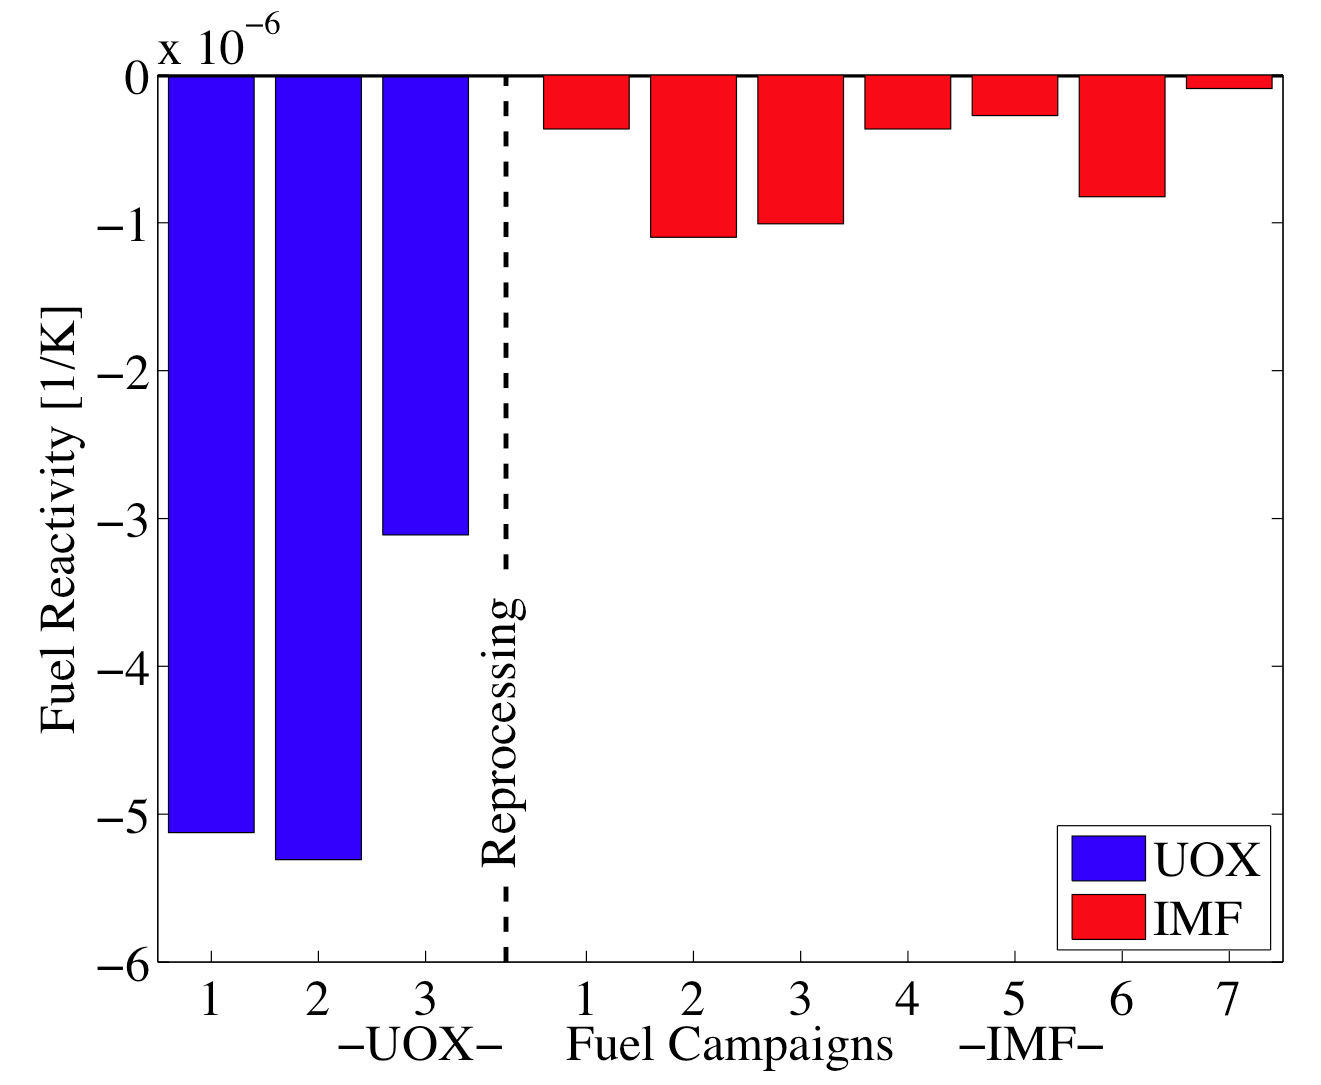


The reactivity coefficient for the fuel at the end of the cycle is shown. The full reactor reactivity coefficient at the end of cycle was −17.3 × 10−6 ± 1.1 × 10−7 (1/K) respectively. The data were generated using Monte Carlo simulations and the graphs do not show the standard deviations.

**Figure S8.** Moderator Thermal Reactivity Coefficients.

**
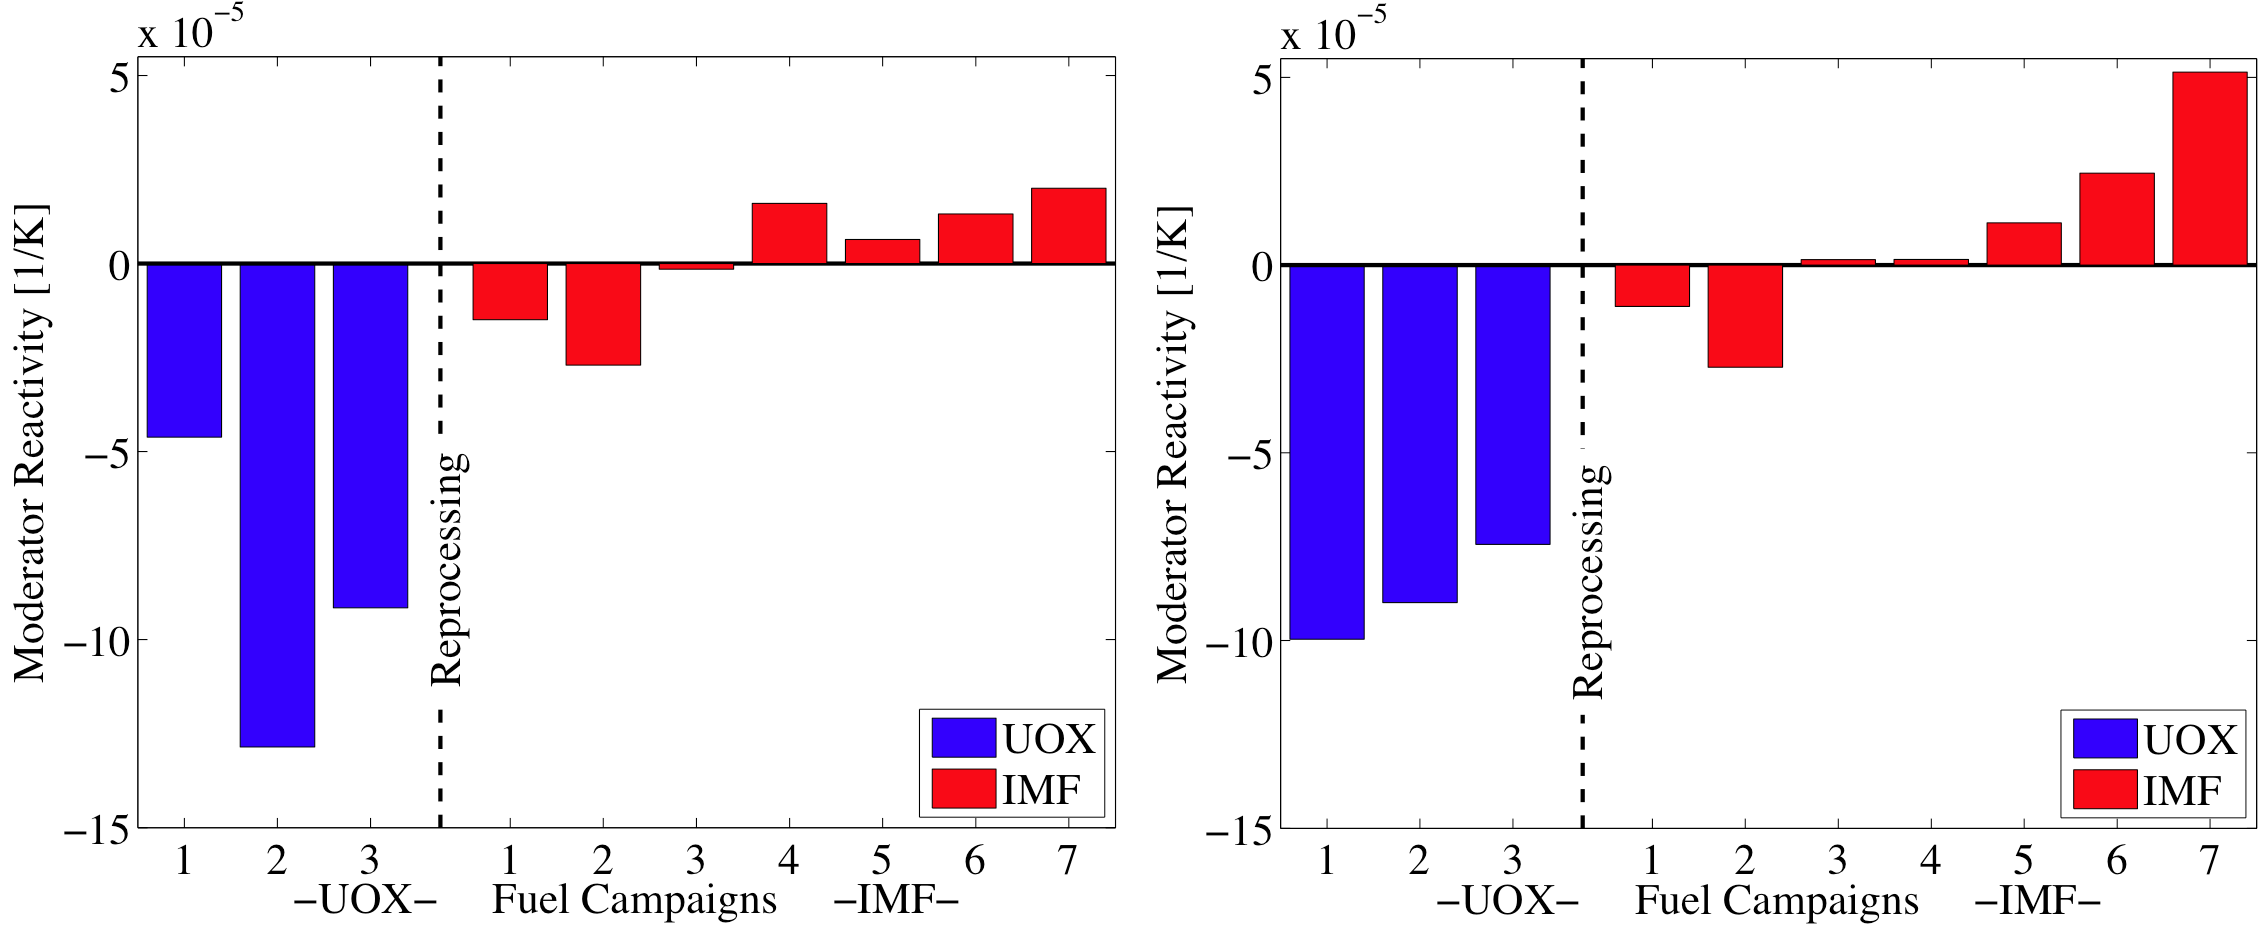
**

The assembly level moderator reactivity coefficients are shown at beginning of cycle (top) and the end of the cycle (bottom). The full reactor reactivity coefficients at the beginning and end of cycle were −3.77 × 10−4 ± 6.9 × 10−6 (1/K) and −3.27 × 10−4 ± 6.1 × 10−6 (1/K) respectively. The coefficients were generated using Monte Carlo simulations and the graphs do not show the standard deviations.

**Figure S9.** Void Reactivity Coefficients


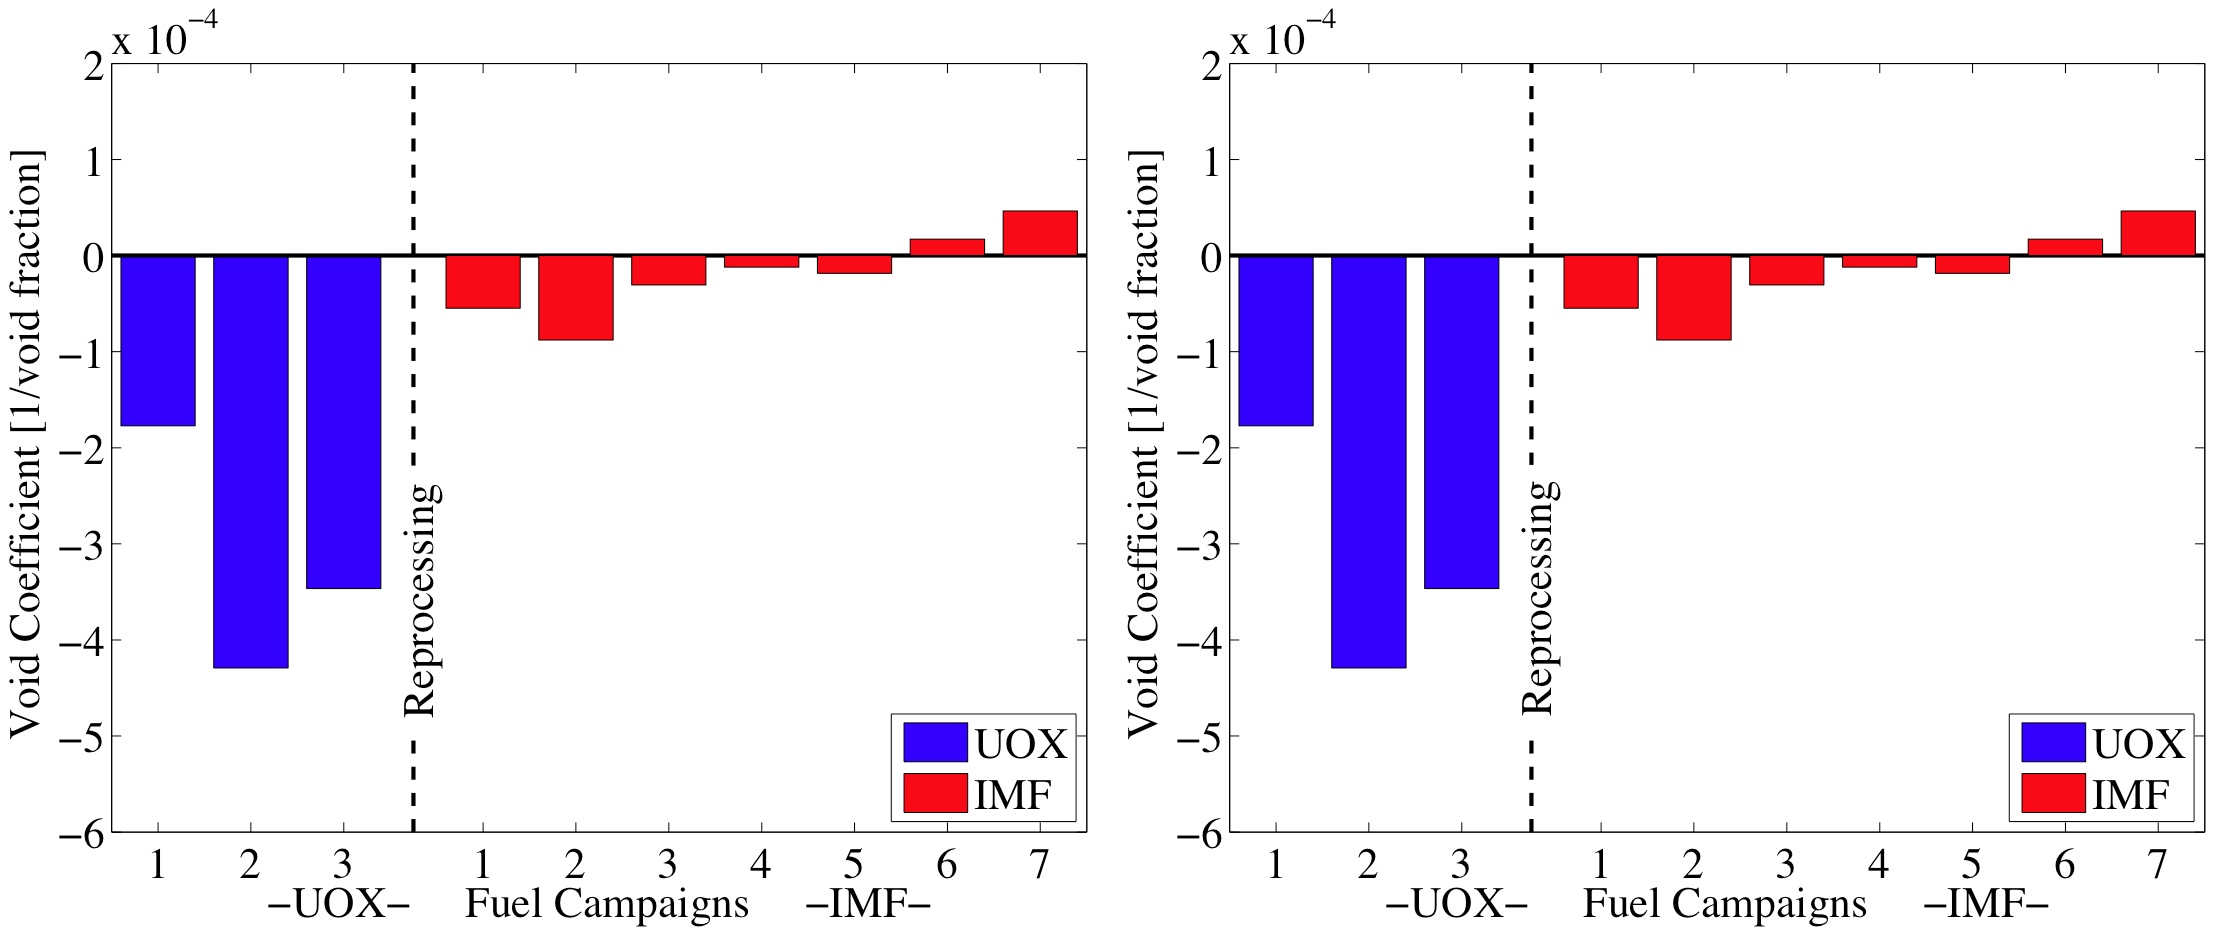


The assembly level void is shown for the beginning of cycle (top) and the end of cycle (bottom). The full reactor void coefficients at the beginning and end of campaign were −0.00185 ± 1.3 × 10−5 (1/K)
and −0.00179 ± 1.1 × 10−5 (1/K) respectively. The coefficients were generated using Monte Carlo simulations and the graphs do not show the standard deviations.

S.4. Uncertainty in Burnup

Figure 10 of the main text shows the power of each assembly type over the reactor cycle. Figure S10 shows the uncertainty of the computation.

**Figure S10.** Assembly level power.

The uncertainty in Figure 10 is shown. Ten simulations with different initial seeds were run and the mean and standard deviation are shown here. The same results were used to compute the mean and standard deviation shown in Figure 11.

References

1. *The Westinghouse AP1000 Advanced Nuclear Plant*; Westinghouse Electric Co, LLC: Butler, PA, USA, 2003; p 17.
2. Pelowitz, D.B.; Durkee, J.W.; Elson, J.S.; Fensin, M.L.; Hendricks, J.S.; James, M.R.; Johns, R.C.; Mckinney, G.W.; Mashnik, S.G.; Verbeke, J.M.; *et al.* *Mcnpx User’s Manual Version 2.7.0*; LA-CP-11.00438; Los Alamos National Laboratory: Los Alamos, NM, USA, 2011.
3. Lamarsh, J.R. *Introduction to Nuclear Engineering*, 3rd ed.; Prentice-Hall: Upper Saddle River, NJ, USA, 2001.
4. International Atomic Energy Agency. *Thermophysical Properties Database of Materials for Light Water Reactors and Heavy Water Reactors: Final Report of a Coordinated Research Project 1999–2005*; International Atomic Energy Agency: Vienna, Austria, 2006.
5. Hellwig, C.; Kasemeyer, U.Inert matrix fuel performance during the first two irradiation cycles in a test reactor: Comparison with modeling results*. J. Nucl. Mater.* **2003**, *319*, 87–94. doi:10.1016/S0022–3115(03)00138–7.

© 2013 by the authors; licensee MDPI, Basel, Switzerland. This article is an open access article distributed under the terms and conditions of the Creative Commons Attribution license (http://creativecommons.org/licenses/by/3.0/).
